# Supplementary material for: Cleaved amplified polymorphic sequences (CAPS) marker for identification of two mutant alleles of the rapeseed BnaA.FAD2 gene
Source: PubMed Central journal article supplement (PMC7588397; doi:10.1007/s11033-020-05828-2), 2020-09-26
Supplement: 11033_2020_5828_MOESM1_ESM.pdf [file 11033_2020_5828_MOESM1_ESM.pdf]

*BnaA.FAD2.a* (Yang) ATGGGTGCAGGTGGAAGAATGCAAGTGTCTCCTCCCTCCAAAAAGTCTGAAACCGACAACATCAAGCGCGTACCCTGCGAGACACCGCCCTTCACTGTCTG 100  
*BraA.FAD2.a* (Yang) ATGGGTGCAGGTGGAAGAATGCAAGTGTCTCCTCCCTCCAAAAAGTCTGAAACCGACAACATCAAGCGCGTACCCTGCGAGACACCGCCCTTCACTGTCTG 100  
*BnaA.FAD2.a* (Zhang) ATGGGTGCAGGTGGAAGAATGCAAGTGTCTCCTCCCTCCAAAAAGTCTGAAACCGACAACATCAAGCGCGTACCCTGCGAGACACCGCCCTTCACTGTCTG 100

H3H4CON1 primer 5' -AGTGTCTCCTCCCTCCAAAA-3'

*BnaA.FAD2.a* (Yang) GAGAACTCAAGAAAGCAATCCCACCGCACTGTTTCAAACGCTCGATCCCTCGCTCTTTCTCCTACCTCATCTGGGACATCATCATAGC--CTCCTGCTTC 198  
*BraA.FAD2.a* (Yang) GAGAACTCAAGAAAGCAATCCCACCGCACTGTTTCAAACGCTCGATCCCTCGCTCTTTCTCCTACCTCATCTGGGACATCATCATAGC--CTCCTGCTTC 198  
*BnaA.FAD2.a* (Zhang) GAGAACTCAAGAAAGCAATCCCACCGCACTGTTTCAAACGCTCGATCCCTCGCTCTTTCTCCTACCTCATCTGGGACATCATCATAGC--CTCCTGCTTC 198

*BnaA.FAD2.a* (Yang) TACTACGTGCCACCACTTACTTCCCTCTCCTCCCTCACCTCTCTCCTACTTCGCCTGGCCTCTCTACTCGGCCTGCCAGGGCTGCGTCCTAACCGGCG 298  
*BraA.FAD2.a* (Yang) TACTACGTGCCACCACTTACTTCCCTCTCCTCCCTCACCTCTCTCCTACTTCGCCTGGCCTCTCTACTCGGCCTGCCAGGGCTGCGTCCTAACCGGCG 298  
*BnaA.FAD2.a* (Zhang) TACTACGTGCCACCACTTACTTCCCTCTCCTCCCTCACCTCTCTCCTACTTCGCCTGGCCTCTCTACTCGGCCTGCCAGGGCTGCGTCCTAACCGGCG 298

HOR4 type mutation [8] (G→A at position 269) CTAG

*BnaA.FAD2.a* (Yang) TCTGGGTCATAGCCCACGAGTGCGGCCACCACGCCTTCAGCGACTACCCAGTGGCTGGACGACACCGTCCGCTCATCTTCCACTCCTTCTCCTCGTCCC 398  
*BraA.FAD2.a* (Yang) TCTGGGTCATAGCCCACGAGTGCGGCCACCACGCCTTCAGCGACTACCCAGTGGCTGGACGACACCGTCCGCTCATCTTCCACTCCTTCTCCTCGTCCC 398  
*BnaA.FAD2.a* (Zhang) TCTGGGTCATAGCCCACGAGTGCGGCCACCACGCCTTCAGCGACTACCCAGTGGCTGGACGACACCGTCCGCTCATCTTCCACTCCTTCTCCTCGTCCC 398

HOR3 type mutation [8] (C→T at position 346) CTAG

*BnaA.FAD2.a* (Yang) TTACTTCTCCTGGAAGTACAGTCATCGACGCCACCATTCCAACACTGGCTCCCTCGAGAGAGACGAAGTGTGTTGTCCCAAGAAGAAGTCAGACATCAAG 498  
*BraA.FAD2.a* (Yang) TTACTTCTCCTGGAAGTACAGTCATCGACGCCACCATTCCAACACTGGCTCCCTCGAGAGAGACGAAGTGTGTTGTCCCAAGAAGAAGTCAGACATCAAG 498  
*BnaA.FAD2.a* (Zhang) TTACTTCTCCTGGAAGTACAGTCATCGACGCCACCATTCCAACACTGGCTCCCTCGAGAGAGACGAAGTGTGTTGTCCCAAGAAGAAGTCAGACATCAAG 498

*BnaA.FAD2.a* (Yang) TGGTACGGCAAGTACCTCAACAACCCTTTGGGACGCACCGTGATGTAAACGGTTT**CAG**TTCACTCTCGGC-----TGGCCTTTGTACTTAGCCTTCAACGTC 594  
*BraA.FAD2.a* (Yang) TGGTACGGCAAGTACCTCAACAACCCTTTGGGACGCACCGTGATGTAAACGGTTT**CAG**TTCACTCTCGGC-----TGGCCTTTGTACTTAGCCTTCAACGTC 594  
*BnaA.FAD2.a* (Zhang) TGGTACGGCAAGTACCTCAACAACCCTTTGGGACGCACCGTGATGTAAACGGTTT**CAG**TTCACTCTCGGC-----TGGCCTTTGTACTTAGCCTTCAACGTC 594

DMS100 type mutation [15] (C→T at position 553) CGGTTTAGTTC

SW Hickory type mutation [28] (AGCC insertion at position 567-568) TCGGCAGCCTGGCC

*BnaA.FAD2.a* (Yang) TCGGGGAGACCTTACGACGGCGGCTTCGCTTGCCATTTCCACCCCAACGCTCCCATCTACAACGACCGTGAGCGTCTCCAGATATAACATCTCCGACGCTG 694  
*BraA.FAD2.a* (Yang) TCGGGAAGACCTTACGACGGCGGCTTCGCTTGCCATTTCCACCCCAACGCTCCCATCTACAACGACCGTGAGCGTCTCCAGATATAACATCTCCGACGCTG 694  
*BnaA.FAD2.a* (Zhang) TCGGGGAGACCTTACGACGGCGGCTTCGCTTGCCATTTCCACCCCAACGCTCCCATCTACAACGACCGTGAGCGTCTCCAGATATAACATCTCCGACGCTG 694

*BnaA.FAD2.a* (Yang) GCATCCTCGCCGTCTGCTACGGTCTCTACCGCTACGCTGCTGTCCAAGGAGTTGCCTCGATGGTCTGCTTCTACGGAGTCCCTCTTCTGATGTCAACGG 794  
*BraA.FAD2.a* (Yang) GCATCCTCGCCGTCTGCTACGGTCTCTACCGCTACGCTGCTGTCCAAGGAGTTGCCTCGATGGTCTGCTTCTACGGAGTCCCTCTTCTGATGTCAACGG 794  
*BnaA.FAD2.a* (Zhang) GCATCCTCGCCGTCTGCTACGGTCTCTACCGCTACGCTGCTGTCCAAGGAGTTGCCTCGATGGTCTGCTTCTACGGAGTCCCTCTTCTGATGTCAACGG 794

H3H4CON2 primer

3' -AGGTTCTCAACGGAGCTA-5'

*BnaA.FAD2.a* (Yang) GTTCTTAGTTTTGATCACTTACTTGCAGCACACGCATCCTTCCCTGCCTCACTATGACTCGTCTGAGTGGGATTGGTTGAGGGGAGCCTTGGCCACCGTT 894  
*BraA.FAD2.a* (Yang) GTTCTTAGTTTTGATCACTTACTTGCAGCACACGCATCCTTCCCTGCCTCACTACGATTCGTCTGAGTGGGATTGGTTGAGGGGAGCCTTGGCTACCGTT 894  
*BnaA.FAD2.a* (Zhang) GTTCTTAGTTTTGATCACTTACTTGCAGCACACGCATCCTTCCCTGCCTCACTATGACTCGTCTGAGTGGGATTGGTTGAGGGGAGCCTTGGCCACCGTT 894

*BnaA.FAD2.a* (Yang) GACAGAGACTACGGCAATCTTGAACAAGGTCTTCCACAATATCACGGACACGCACGTGGCGCATCACCTGTTCTCGACCATGCCGATTATCATGCGATGG 994  
*BraA.FAD2.a* (Yang) GACAGAGACTACGGCAATCTTGAACAAGGTCTTCCACAATATCACGGACACGCACGTGGCGCATCACCTGTTCTCGACCATGCCGATTATCATGCGATGG 994  
*BnaA.FAD2.a* (Zhang) GACAGAGACTACGGCAATCTTGAACAAGGTCTTCCACAATATCACGGACACGCACGTGGCGCATCACCTGTTCTCGACCATGCCGATTATCATGCGATGG 994

*BnaA.FAD2.a* (Yang) AAGCTACCAAGGCGATAAAGCCGATACTG-GGAGAGTATTATCAGTTCGATGGGACGCCGGTGGTTAAGGCGATGTGGAGGGAGGCGAAGGAGTGTATCT 1093  
*BraA.FAD2.a* (Yang) AAGCTACCAAGGCGATAAAGCCGATACTG-GGAGAGTATTATCAGTTCGATGGGACGCCGGTGGTTAAGGCGATGTGGAGGGAGGCGAAGGAGTGTATCT 1093  
*BnaA.FAD2.a* (Zhang) AAGCTACCAAGGCGATAAAGCCGATACTG-GGAGAGTATTATCAGTTCGATGGGACGCCGGTGGTTAAGGCGATGTGGAGGGAGGCGAAGGAGTGTATCT 1093

*BnaA.FAD2.a* (Yang) ATGTGGAACCGGACAGGCAAGGTGAGAAGAAAGGTGTGTCTGGTACAACAATAAGTTATGA 1155

*BraA.FAD2.a* (Yang) ATGTGGAACCGGACAGGCAAGGTGAGAAGAAAGGTGTGTCTGGTACAACAATAAGTTATGA 1155

*BnaA.FAD2.a* (Zhang) ATGTGGAACCGGACAGGCAAGGTGAGAAGAAAGGTGTGTCTGGTACAACAATAAGTTATGA 1155

**Fig. S1** The alignment of the sequences of the *BnaA.FAD2.a* (Yang) gene from *B.napus*, the *BraA.FAD2.a* (Yang) gene from *B.rapa* [28] and the *BnaA.FAD2.a* (Zhang) gene from *B.napus* [18] (GenBank accession AY577313). The differences are indicated with green color and the underlined nucleotides represent the codons in the coding sequence. The sequence of the *BnaA.FAD2.a* (Zhang) gene was used for amplification of the  $\Delta 12$  oleate desaturase gene from genome A (located on the chromosome A5), and therefore, this sequence is the basis for design of described CAPS markers. The positions of HOR3 and HOR4 type mutations in the studied gene, and the allelic forms that are specific to the HO mutants [8], are indicated using the color scheme that corresponds to the colors used for the display of each mutation shown in Fig. 1. The sequences of the H3H4CON1 (forward) and the H3H4CON2 (reverse) primers used for the amplification of the specific fragment of the *BnaA.FAD2* gene are also shown and the corresponding sequences of the gene are indicated with yellow color. In addition, the positions of other mutations in this gene, discovered and described by other authors [15, 28] are also indicated for comparison

## Molecular Biology Reports

### Cleaved amplified polymorphic sequences (CAPS) marker for identification of two mutant alleles of the rapeseed *BnaA.FAD2* gene

Marcin Matuszczak, Stanisław Spasibionek, Katarzyna Gacek, Iwona Bartkowiak-Broda

Corresponding author: Marcin Matuszczak

Plant Breeding and Acclimatization Institute, National Research Institute, Research Division in Poznań, Poland

E-mail: marmat@nico.ihar.poznan.pl
