# Supplementary material for: Cleaved amplified polymorphic sequences (CAPS) marker for identification of two mutant alleles of the rapeseed BnaA.FAD2 gene
Source: PubMed Central journal article supplement (PMC7588397; doi:10.1007/s11033-020-05828-2), 2020-09-26
Supplement: 11033_2020_5828_MOESM3_ESM.pdf [file 11033_2020_5828_MOESM3_ESM.pdf]

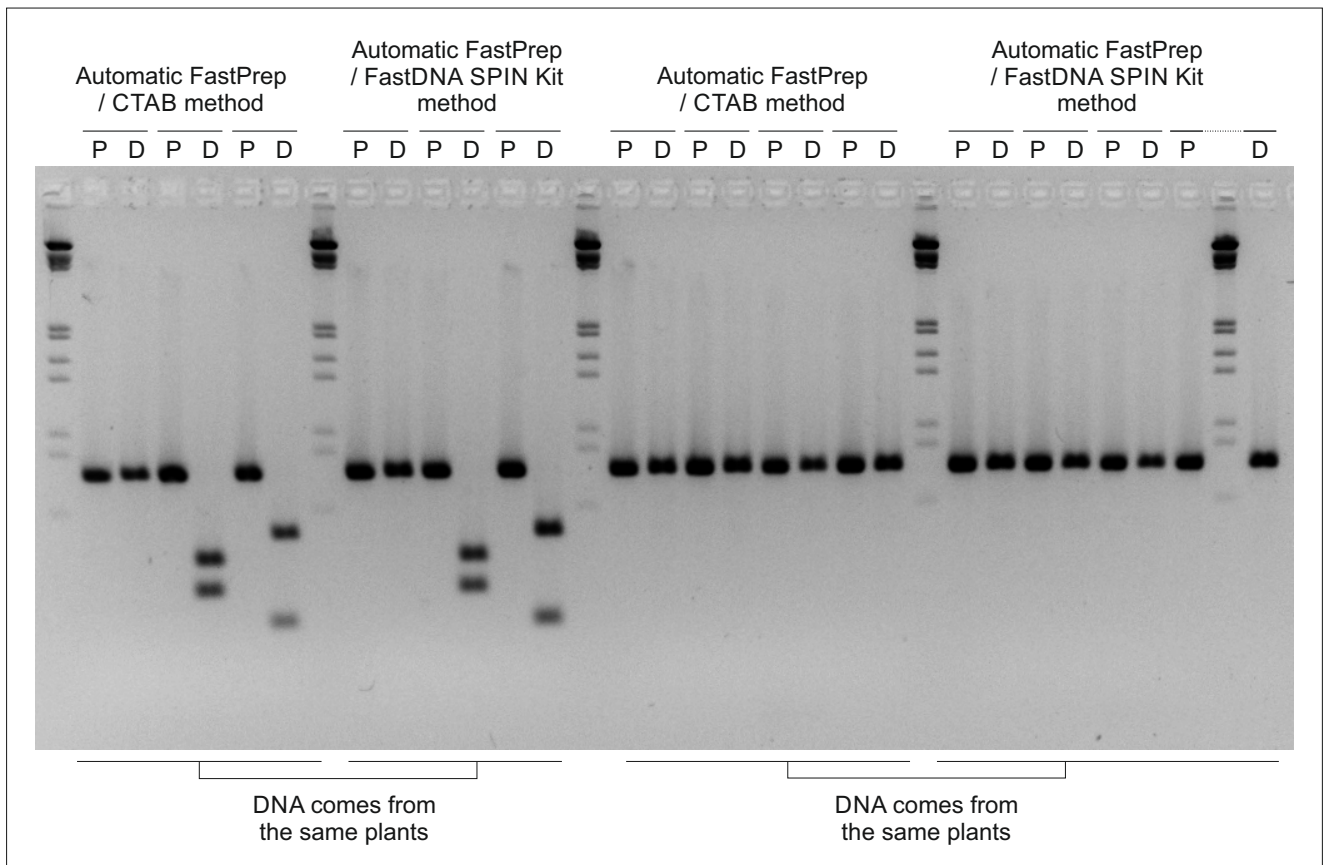

**Fig. S3** Comparison of the CAPS marker results obtained for the same set of rapeseed plants using automatic FastPrep / CTAB and FastPrep / FastDNA SPIN Kit DNA extraction procedures. For each analyzed plant, two samples (designated with letters P and D, which are explained in Fig. 2) representing two steps of the CAPS protocol were applied on the gel

### Molecular Biology Reports

**Cleaved amplified polymorphic sequences (CAPS) marker for identification of two mutant alleles of the rapeseed *BnaA.FAD2* gene**  
 Marcin Matuszczak, Stanisław Spasibonek, Katarzyna Gacek, Iwona Bartkowiak-Broda

Corresponding author: Marcin Matuszczak  
 Plant Breeding and Acclimatization Institute, National Research Institute, Research Division in Poznań, Poland  
 E-mail: marmat@nico.ihar.poznan.pl
