# Supplementary material for: Cleaved amplified polymorphic sequences (CAPS) marker for identification of two mutant alleles of the rapeseed BnaA.FAD2 gene
Source: PubMed Central journal article supplement (PMC7588397; doi:10.1007/s11033-020-05828-2), 2020-09-26
Supplement: 11033_2020_5828_MOESM5_ESM.pdf [file 11033_2020_5828_MOESM5_ESM.pdf]

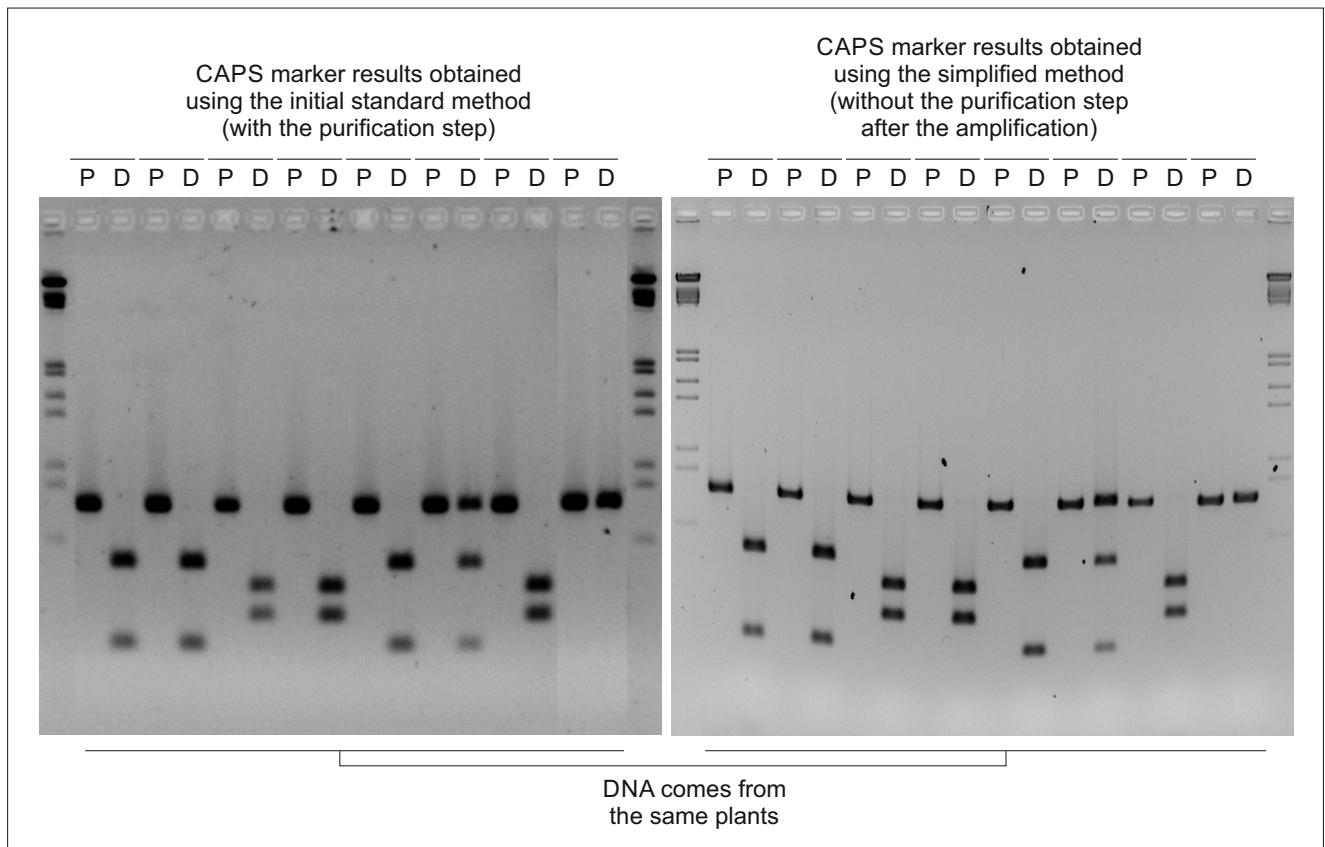

**Fig. S5** Comparison of the CAPS marker results obtained for the same set of rapeseed plants using the initial standard method (with the purification step) and the simplified method (without the purification step). For each analyzed plant, two samples (designated with letters P and D, which are explained in Fig. 2) representing two steps of the CAPS protocol were applied on the gel (for better comparison, only two steps are shown for the initial standard method)

#### Molecular Biology Reports

**Cleaved amplified polymorphic sequences (CAPS) marker for identification of two mutant alleles of the rapeseed *BnaA.FAD2* gene**  
 Marcin Matuszczak, Stanisław Spasibonek, Katarzyna Gacek, Iwona Bartkowiak-Broda

Corresponding author: Marcin Matuszczak  
 Plant Breeding and Acclimatization Institute, National Research Institute, Research Division in Poznań, Poland  
 E-mail: marmat@nico.ihar.poznan.pl
