# Supplementary material for: Cleaved amplified polymorphic sequences (CAPS) marker for identification of two mutant alleles of the rapeseed BnaA.FAD2 gene
Source: PubMed Central journal article supplement (PMC7588397; doi:10.1007/s11033-020-05828-2), 2020-09-26
Supplement: 11033_2020_5828_MOESM6_ESM.pdf [file 11033_2020_5828_MOESM6_ESM.pdf]

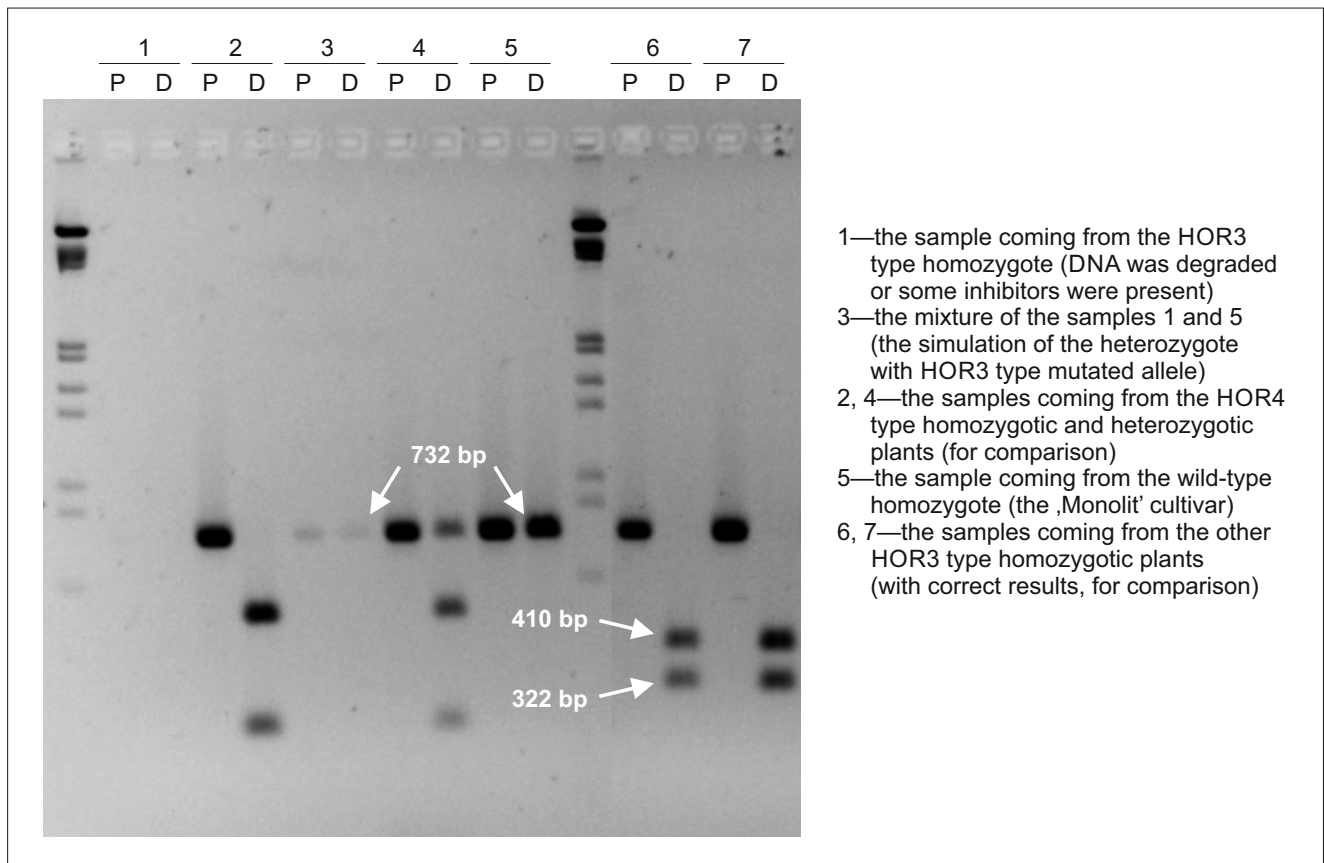

**Fig. S6** Results of testing the ability to detect heterozygous plants possessing both the HOR3 type mutated and wild-type alleles of the *BnaA.FAD2* gene of rapeseed by using the CAPS marker. All the tested DNA samples are described in the figure. For each analyzed DNA, two samples (designated with letters P and D, which are explained in Fig. 2) representing two steps of the CAPS protocol were applied on the gel. The white arrows indicate the characteristic bands of the HOR3 type mutated and wild-type alleles

## Molecular Biology Reports

**Cleaved amplified polymorphic sequences (CAPS) marker for identification of two mutant alleles of the rapeseed *BnaA.FAD2* gene**  
 Marcin Matuszczak, Stanisław Spasibonek, Katarzyna Gacek, Iwona Bartkowiak-Broda

Corresponding author: Marcin Matuszczak  
 Plant Breeding and Acclimatization Institute, National Research Institute, Research Division in Poznań, Poland  
 E-mail: marmat@nico.ihar.poznan.pl
