# Supplementary material for: Cleaved amplified polymorphic sequences (CAPS) marker for identification of two mutant alleles of the rapeseed BnaA.FAD2 gene
Source: PubMed Central journal article supplement (PMC7588397; doi:10.1007/s11033-020-05828-2), 2020-09-26
Supplement: 11033_2020_5828_MOESM12_ESM.pdf [file 11033_2020_5828_MOESM12_ESM.pdf]

**Table S1** The phenotypic characteristics of selected *B. napus* lines and cultivars compared with the results of the CAPS marker analysis for these plants. HOR3 and HOR4 type mutated alleles are named “HOR3” and “HOR4”, respectively, and the wild-type alleles with no HOR3 and HOR4 type mutations are named “Wild”

| Lines or cultivars                               | Seed yield (dt/ha) | Oil content (%) | Total of glucosinolates ( $\mu\text{mol/g}$ ) | Fatty acid (%) |                |                 | <i>BnaA.FAD2</i> <sup>1</sup> alleles (using CAPS marker) |
|--------------------------------------------------|--------------------|-----------------|-----------------------------------------------|----------------|----------------|-----------------|-----------------------------------------------------------|
|                                                  |                    |                 |                                               | Oleic C18:1    | Linoleic C18:2 | Linolenic C18:3 |                                                           |
| M681 type LL mutant line                         | 12.0               | 46.6            | 10.7                                          | 61.0           | 27.5           | 2.7             | Wild/Wild                                                 |
| HOR3-M10453 type HO mutant line                  | 24.7               | 48.4            | 12.2                                          | 76.1           | 8.7            | 7.2             | HOR3/HOR3                                                 |
| HOR4-M10464 type HO mutant line                  | 18.6               | 47.7            | 8.7                                           | 76.6           | 8.8            | 7.4             | HOR4/HOR4                                                 |
| PN-837 type HOLL F <sub>9</sub> recombinant line | 14.2               | 43.9            | 13.0                                          | 76.1           | 12.3           | 2.4             | HOR4/HOR4                                                 |
| PN-880 type HOLL F <sub>5</sub> recombinant line | 32.0               | 44.6            | 12.7                                          | 78.3           | 11.2           | 3.2             | Wild/Wild                                                 |
| ‘Monolit’ cultivar                               | 31.1               | 45.6            | 11.9                                          | 63.3           | 19.5           | 9.0             | Wild/Wild                                                 |

<sup>1</sup>Gene nomenclature follows the rules proposed by Østergaard and King [12].

## Molecular Biology Reports

**Cleaved amplified polymorphic sequences (CAPS) marker for identification of two mutant alleles of the rapeseed *BnaA.FAD2* gene**  
 Marcin Matuszczak, Stanisław Spasibonek, Katarzyna Gacek, Iwona Bartkowiak-Broda

Corresponding author: Marcin Matuszczak  
 Plant Breeding and Acclimatization Institute, National Research Institute, Research Division in Poznań, Poland  
 E-mail: marmat@nico.i.har.poznan.pl
